# Supplementary material for: Novel bio-solar hybrid photoelectrochemical synthesis for selective hydrogen peroxide production
Source: Royal Society of Chemistry journal article supplement (doi:10.1039/d4gc02220c), 2024-01-01
Supplement: d4gc02220c1.pdf [file d4gc02220c1.pdf]

## Supporting Information

### **Novel bio-solar hybrid photoelectrochemical synthesis for selective hydrogen peroxide production**

Rusen Zou<sup>a1</sup>, Babak Rezaei<sup>b1</sup>, Xiaoyong Yang<sup>c</sup>, Wenjing Zhang<sup>a</sup>, Stephan Sylvest Keller<sup>b</sup>,  
Yifeng Zhang<sup>a\*</sup>

<sup>a</sup> Department of Environmental and Resource Engineering, Technical University of Denmark, DK-2800 Lyngby, Denmark

<sup>b</sup> National Centre for Nano Fabrication and Characterization, DTU Nanolab, Technical University of Denmark, 2800 Kgs. Lyngby, Denmark

<sup>c</sup> School of Environmental and Material Engineering, Yantai University, Yantai, Shandong, 264005, China

\*Corresponding author:

Dr. Yifeng Zhang

Department of Environmental and Resource Engineering, Technical University of Denmark, Denmark

Tel: (+45) 45251410

Fax: (+45) 45933850

E-mail address: yifz@dtu.dk; yifzmfc@gmail.com

<sup>1</sup> These authors contributed equally.

Supporting Information 22 Pages, 3 Texts, 2 Tables and 12 Figures.

### List of text, table and figure captions

**Text. S1.** Chemicals and Reagents.

**Text. S2.** Detailed calculation methods of the Faradaic efficiency.

**Text. S3.** Detailed operating parameters of the HPLC-MS/MS system.

**Table S1.** Previous studies on (microbial) electrosynthesis of  $\text{H}_2\text{O}_2$  using different types of cathode electrodes.

**Table. S2.** Main characteristics of WWTP secondary effluent.

**Fig. S1.** Side view (a) and top view (b) of the custom-made electrochemical setup employed for electropolymerization of pTTh on the surface of GP.

**Fig. S2.** Schematic representation of the BSPS reactor.

**Fig. S3.** The stable and repeatable voltage output generated by the anode of the enrichment stage MFC.

**Fig. S4.** The effect of pTTh catalyst layers thickness (current and Faradic efficiency) on  $\text{H}_2\text{O}_2$  production in the BSPS reactor.

**Fig. S5.** The effect of applied voltage (current and Faradic efficiency) on  $\text{H}_2\text{O}_2$  production in the BSPS reactor.

**Fig. S6.** The effect of cathodic aeration rate (catholyte DO, current, and Faradic efficiency) on  $\text{H}_2\text{O}_2$  production in the BSPS reactor.

**Fig. S7.** The effect of initial catholyte pH (current, Faradic efficiency, and catholyte pH variation) on  $\text{H}_2\text{O}_2$  production in the BSPS reactor.

**Fig. S8.** The effect of light intensity (current and Faradic efficiency) on  $\text{H}_2\text{O}_2$  production in the BSPS reactor.

**Fig. S9.** The effect of electrolyte nature (current (a) and Faradic efficiency (b)) and concentration (accumulated  $\text{H}_2\text{O}_2$  concentration (c) and current (d)) on  $\text{H}_2\text{O}_2$  production in the BSPS reactor.

**Fig. S10.** pH dependent  $\text{H}_2\text{O}_2$  selectivity of pTTh calculated by RRDE results.

**Figure S11.** Concentration of  $\text{H}_2\text{O}_2$  produced cumulatively with reaction time in BSPS reactor.

**Fig. S12.** Pseudo-first-order rate constants (k) of the degradation of 20 typical micropollutants from WWTP secondary effluent during BSEF treatment using pTTh/GP photocathode electrode and GP cathode, respectively.

### **Text. S1.** Chemicals and Reagents

20 recalcitrant micropollutants are the following. **Antidepressants:** citalopram ( $26 \mu\text{g L}^{-1}$ ) and venlafaxine ( $26 \mu\text{g L}^{-1}$ ); **Immunosuppressant:** mycophenolic acid ( $30 \mu\text{g L}^{-1}$ ); **Antibiotics:** azithromycin ( $51 \mu\text{g L}^{-1}$ ); **Blood pressure regulators and lipid-lowering agent:** metoprolol ( $26 \mu\text{g L}^{-1}$ ), hydrochlorothiazide ( $26 \mu\text{g L}^{-1}$ ), sulfamethoxazole ( $130 \mu\text{g L}^{-1}$ ), and bezafibrate ( $30 \mu\text{g L}^{-1}$ ); **X-ray contrast media:** iohexol ( $30 \mu\text{g L}^{-1}$ ) and iopromide ( $55 \mu\text{g L}^{-1}$ ); **Analgesics:** carbamazepine ( $27 \mu\text{g L}^{-1}$ ), diclofenac ( $23 \mu\text{g L}^{-1}$ ) and mefenamic acid ( $20 \mu\text{g L}^{-1}$ ); **Anti-inflammatory:** ketoprofen ( $80 \mu\text{g L}^{-1}$ ) and bicalutamide ( $26 \mu\text{g L}^{-1}$ ); **Anti-corrosion:** 1-H-benzotriazole ( $28 \mu\text{g L}^{-1}$ ), 5-chlorobenzotriazole ( $28 \mu\text{g L}^{-1}$ ) and 5-methyl-1H-benzotriazole ( $27 \mu\text{g L}^{-1}$ ); **Herbicide:** clofibric acid ( $30 \mu\text{g L}^{-1}$ ).

All the chemicals were used as received without further purification. All reagent solutions were prepared with ultrapure water ( $18.2 \text{ M}\Omega \text{ cm}$ ) produced from a PURELAB flex purification system (Holm & Halby, Denmark). WWTPs secondary effluent were collected from Skovshoved and Lyngby WWTP, Copenhagen, Denmark, respectively. The natural water samples were filtered by  $0.45 \mu\text{m}$  cellulose acetate membrane before use, and the main water quality parameters were listed in **Table S2**.

**Text. S2.** Detailed calculation methods of the Faradaic efficiency

The current efficiency (CE, %) for electrosynthesis of H<sub>2</sub>O<sub>2</sub> in the MES was calculated according to Eq. (1).

$$CE (\%) = \frac{nFVC}{Q} \times 100 \quad (1)$$

where n is the number of electrons transferred per mole H<sub>2</sub>O<sub>2</sub> generated (n = 2 H<sub>2</sub>O<sub>2</sub>) F is Faraday's number (96,485 \*10<sup>4</sup> C mol<sup>-1</sup>), V is the catholyte volume (0.18 L), C is the molar concentration of H<sub>2</sub>O<sub>2</sub> measured, and Q is the cumulative charge injected during operation (C). For the computation of Q the current in the MES is recorded and multiplied with the electrolysis time t (s).

**Text. S3.** Detailed operating parameters of the HPLC-MS/MS system

For analysis, 900  $\mu\text{L}$  of filtered samples was transferred into a HPLC vial and 100  $\mu\text{L}$  of internal standard was afterwards added into the HPLC vial. Lastly, 10  $\mu\text{L}$  of sample from the HPLC vial was injected and analyzed by HPLC-MS/MS.

The HPLC system consisted of a pump, a column oven, a degasser and an auto-sampler and was from Agilent 1290 Infinity, USA. Chromatographic separation was performed using a C18 column (2.1 mm x 50 mm, 1.8  $\mu\text{m}$ , Eclipse Agilent, USA). The temperature of the HPLC column oven was 35  $^{\circ}\text{C}$ , and the constant flow rate was 0.6  $\text{mL min}^{-1}$ . The HPLC gradient of 0.1 % formic acid in ultrapure water (solvent A) and 0.1% formic acid in acetonitrile (solvent B) was used in ESI + mode, while 5 mM ammonium formate in ultrapure water (solvent A) and 5 mM ammonium formate in 90% Acetonitrile/10% ultrapure water was used in ESI-mode. The mass spectrometer equipped with the triple quadrupole was from Agilent (6470 series) USA.

Dynamic multiple reaction monitoring (MRM), which can automatically separate the transitions of micropollutants into multiple MRM tables according to the retention time window for each transition, was implemented for ESI+ modes. For the analysis under ESI + mode, the HPLC gradient was initiated with 0% B for 2 min, followed by increasing the gradient B to 15 %, 20 %, 36 %, 45 %, 60 %, and 75 % after 2 min, 3 min, 2 min, 1 min, 2 min and 2 min, respectively. Before each injection, initial gradient conditions were re-established for 3 min. Nitrogen was used as the sheath gas as well as the collision gas. For the analysis under ESI- mode, a normal MRM method was implemented. The HPLC gradient was initiated with 0% B, followed by a linear increase of gradient B up to 60 % within 8 min. Initial gradient conditions were also re-established for 3 min. For both ESI + and ESI-, the sheath gas flow was 12  $\text{L min}^{-1}$  with the temperature of 400  $^{\circ}\text{C}$ , while the gas flow was 10  $\text{L min}^{-1}$  with the

temperature of 260 °C. The voltage for the capillary was 4500 V. The voltage for ESI + and ESI- was 500 and 0 V, respectively.

**Table S1.** Previous studies on (microbial) electrosynthesis of H<sub>2</sub>O<sub>2</sub> using different types of cathode electrodes.

| System types | Cathode materials                                                          | Operating conditions                                                                                      | Reactor volume               | H <sub>2</sub> O <sub>2</sub> production rate  | Energy consumption                                     | References |
|--------------|----------------------------------------------------------------------------|-----------------------------------------------------------------------------------------------------------|------------------------------|------------------------------------------------|--------------------------------------------------------|------------|
| MFC          | 2D Graphite                                                                | pH of 7 and 100 mM Na <sub>2</sub> SO <sub>4</sub> and cathodic aeration rate of 191 mL min <sup>-1</sup> | 160 mL (80 mL of cathode)    | 6.6 mg L <sup>-1</sup> h <sup>-1</sup>         | -                                                      | 1          |
| MFC          | Nitric acid pretreatment of 3D graphite cathode                            | pH of 7 and 50 mM Na <sub>2</sub> SO <sub>4</sub>                                                         | 82 mL (50 mL of cathode)     | 1.5 mg L <sup>-1</sup> h <sup>-1</sup>         | -                                                      | 2          |
| MFC          | 3D electrochemically modified graphite/carbon black/active carbon particle | pH of 7 and 50 mM Na <sub>2</sub> SO <sub>4</sub>                                                         | 204.5 mL (120 mL of cathode) | 6.8/7.1/8.1 mg L <sup>-1</sup> h <sup>-1</sup> | -                                                      | 3          |
| MEC          | 3D Electrochemically modified graphite particle                            | pH of 7, 50 mM Na <sub>2</sub> SO <sub>4</sub> , and applied voltage of 0.4 V                             | 96 mL (64 mL of cathode)     | 88.2 mg L <sup>-1</sup> h <sup>-1</sup>        | 0.7 kWh kg <sup>-1</sup> H <sub>2</sub> O <sub>2</sub> | 4          |
| MEC          | 2D Carbon black and graphite hybrid air cathode                            | pH of 7, 50 mM NaCl, cathodic aeration rate of 1500 mL min <sup>-1</sup> , and applied voltage of 0.6 V   | 42 mL (14 mL of cathode)     | 3.3 mg L <sup>-1</sup> h <sup>-1</sup>         | -                                                      | 5          |
| MEC          | 2D vulcan carbon coated GDE                                                | pH of 7, 200 mM NaCl, cathodic aeration rate of 20 mL min <sup>-1</sup> , and applied voltage of 0.31 V   | 218 mL (18 mL of cathode)    | 8.8 mg L <sup>-1</sup> h <sup>-1</sup>         | 1.1 kWh kg <sup>-1</sup> H <sub>2</sub> O <sub>2</sub> | 6          |

**Table S1.** (Continued)

| System types | Cathode materials                                                          | Operating conditions                                                                                                               | Reactor volume              | H <sub>2</sub> O <sub>2</sub> production rate                                                                                             | Energy consumption                                                               | References    |
|--------------|----------------------------------------------------------------------------|------------------------------------------------------------------------------------------------------------------------------------|-----------------------------|-------------------------------------------------------------------------------------------------------------------------------------------|----------------------------------------------------------------------------------|---------------|
| MEC          | 2D GDE                                                                     | pH of 7, 50 mM NaCl, and applied voltage of 0.9 V                                                                                  | 18.8 mL (9.4 mL of cathode) | 4.2 mg L <sup>-1</sup> h <sup>-1</sup>                                                                                                    | 1.8 kWh kg <sup>-1</sup> H <sub>2</sub> O <sub>2</sub>                           | 7             |
| MEC          | 2D Carbon GDE                                                              | Tap water, cathodic aeration rate of 2000 mL min <sup>-1</sup> , and applied voltage of 1.0-1.6 V (CEM) or 1.6-2.0 V(AEM)          | 110 L (10 L of cathode)     | 0.02 mg L <sup>-1</sup> h <sup>-1</sup> (AEM) and 0.28 mg L <sup>-1</sup> h <sup>-1</sup> (CEM)                                           | -                                                                                | 8             |
| MEC          | 10 of 2D Graphites                                                         | pH of 3, 50 mM Na <sub>2</sub> SO <sub>4</sub> , cathodic aeration rate of 400 mL min <sup>-1</sup> , and applied voltage of 0.6 V | 20 L (10 L of cathode)      | 10.82 mg L <sup>-1</sup> h <sup>-1</sup>                                                                                                  | 0.3 kWh kg <sup>-1</sup> H <sub>2</sub> O <sub>2</sub>                           | 9             |
| MEC          | Additive manufacturing-derived free-standing 3D pyrolytic carbon electrode | pH of 2, 50 mM Na <sub>2</sub> SO <sub>4</sub> , cathodic aeration rate of 3.6 mL min <sup>-1</sup> , and applied voltage of 0.4 V | 360 mL (180 mL of cathode)  | 10.77 mg L <sup>-1</sup> h <sup>-1</sup>                                                                                                  | 1.0 kWh kg <sup>-1</sup> H <sub>2</sub> O <sub>2</sub>                           | 10            |
| BSPS         | pTTh/GP photocathode                                                       | pH of 2, 50 mM Na <sub>2</sub> SO <sub>4</sub> , and cathodic aeration rate of 2 mL min <sup>-1</sup>                              | 360 mL (180 mL of cathode)  | 19.38 mg L <sup>-1</sup> h <sup>-1</sup> (applied voltage of 0.1V) and 16.29 mg L <sup>-1</sup> h <sup>-1</sup> (without applied voltage) | 0.1 kWh kg <sup>-1</sup> H <sub>2</sub> O <sub>2</sub> (applied voltage of 0.1V) | In this study |



**Table. S2.** Main characteristics of WWTP secondary effluent.

| Indexes                       | Values                           |
|-------------------------------|----------------------------------|
| Conductivity                  | 1319 $\mu\text{s cm}^{-1}$       |
| pH                            | 7.65                             |
| DO                            | 7.53 $\text{mg L}^{-1}$ (22.3°C) |
| TOC                           | 25.48 $\text{mg L}^{-1}$         |
| COD                           | 68.77 $\text{mg L}^{-1}$         |
| TS                            | 2.82 $\text{mg L}^{-1}$          |
| NO <sub>x</sub> -N            | 2.25 $\text{mg L}^{-1}$          |
| NH <sub>4</sub> -N            | 3.42 $\text{mg L}^{-1}$          |
| PO <sub>4</sub> -P            | 0.59 $\text{mg L}^{-1}$          |
| SO <sub>4</sub> <sup>2-</sup> | 22.05 $\text{mg L}^{-1}$         |
| Cl <sup>-</sup>               | 230.04 $\text{mg L}^{-1}$        |

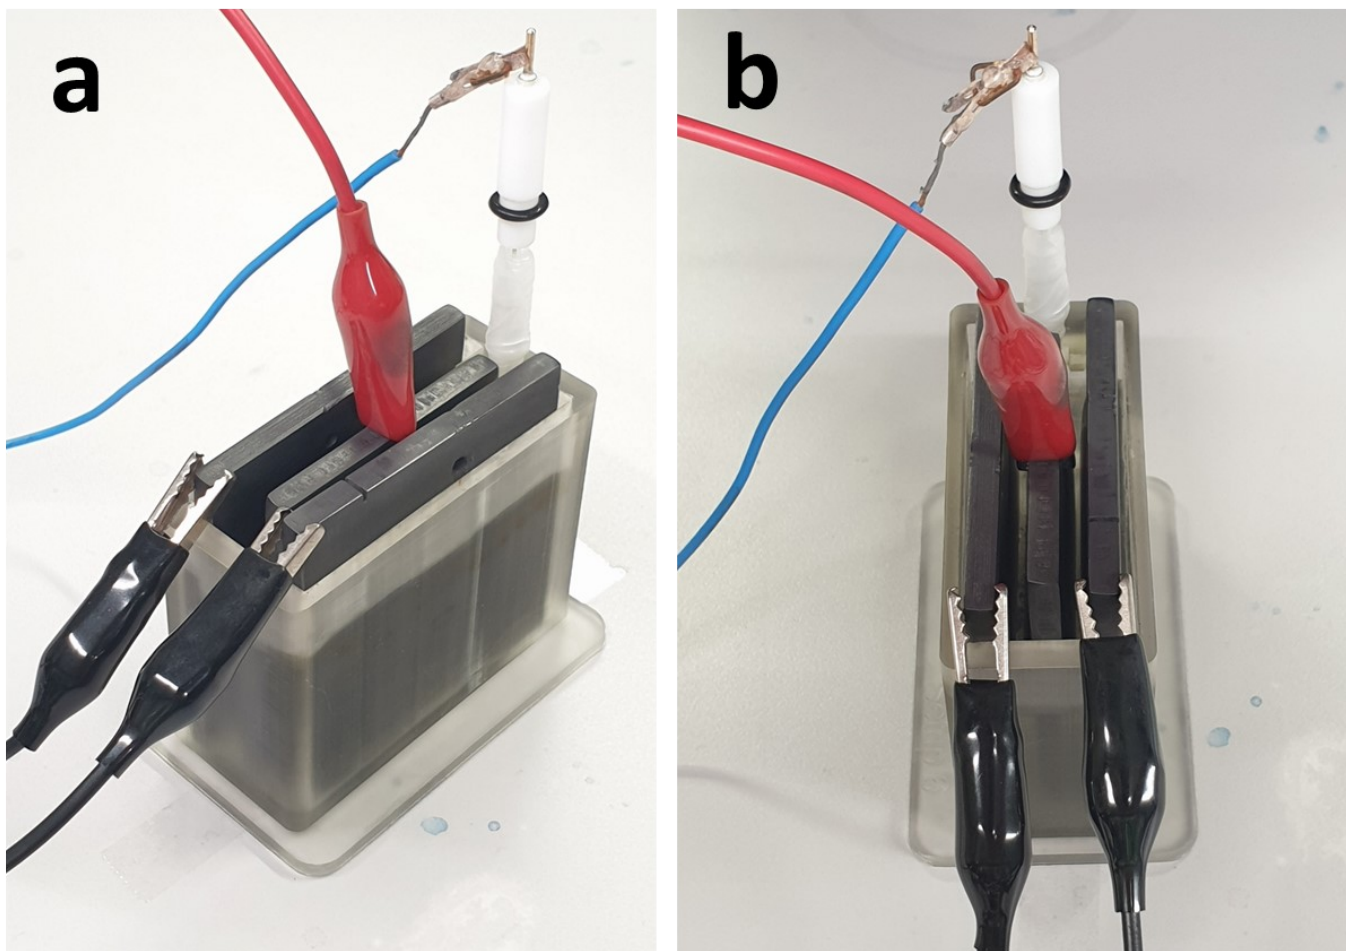

**Fig. S1.** Side view (a) and top view (b) of the custom-made electrochemical setup employed for electropolymerization of pTTh on the surface of GP.

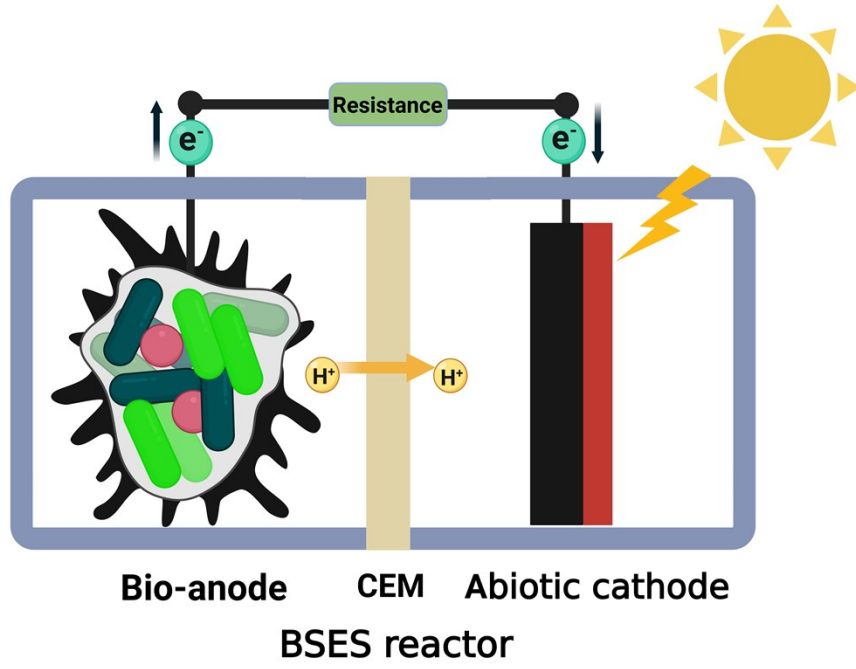

**Fig. S2.** Schematic representation of the BSES reactor.

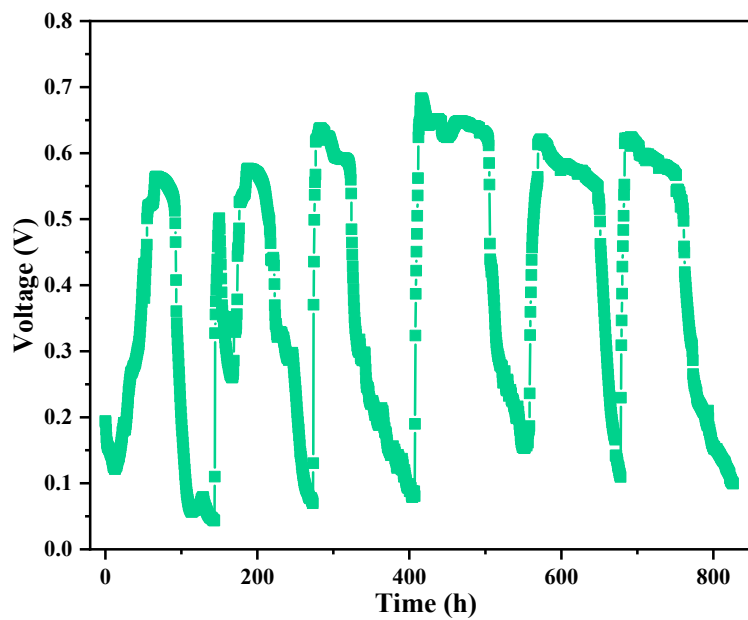

**Fig. S3.** The stable and repeatable voltage output generated by the anode of the enrichment stage MFC.

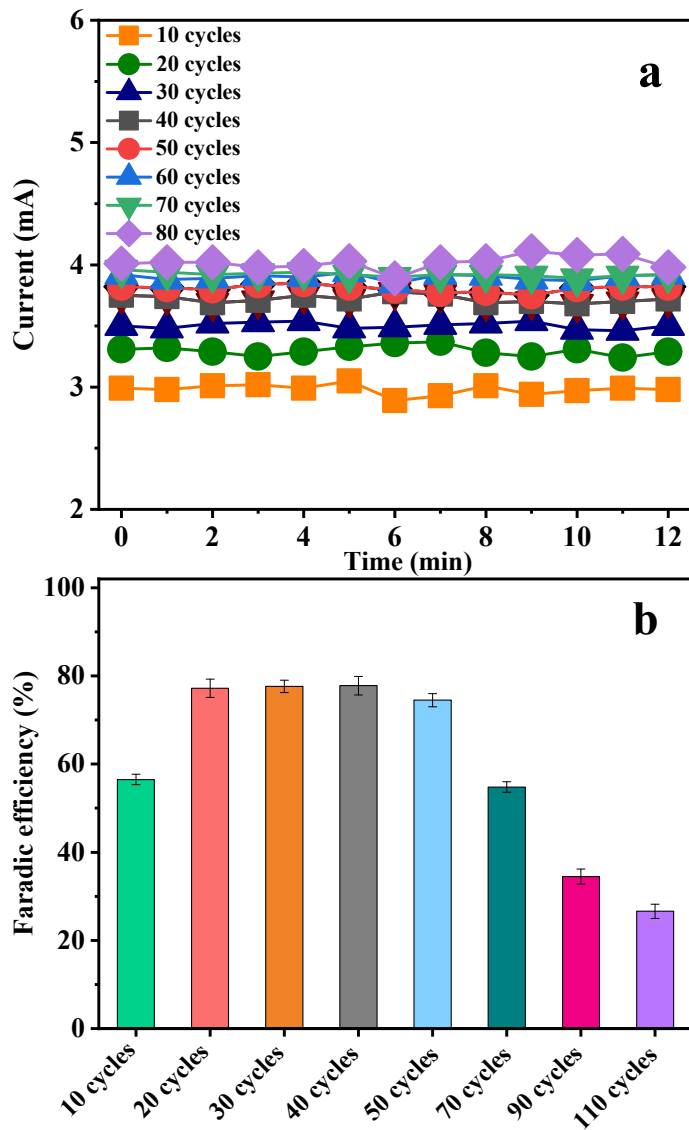

**Fig. S4.** The effect of pTTh catalyst layers thickness (current (a) and Faradic efficiency (b)) on  $\text{H}_2\text{O}_2$  production in the BSPS reactor.

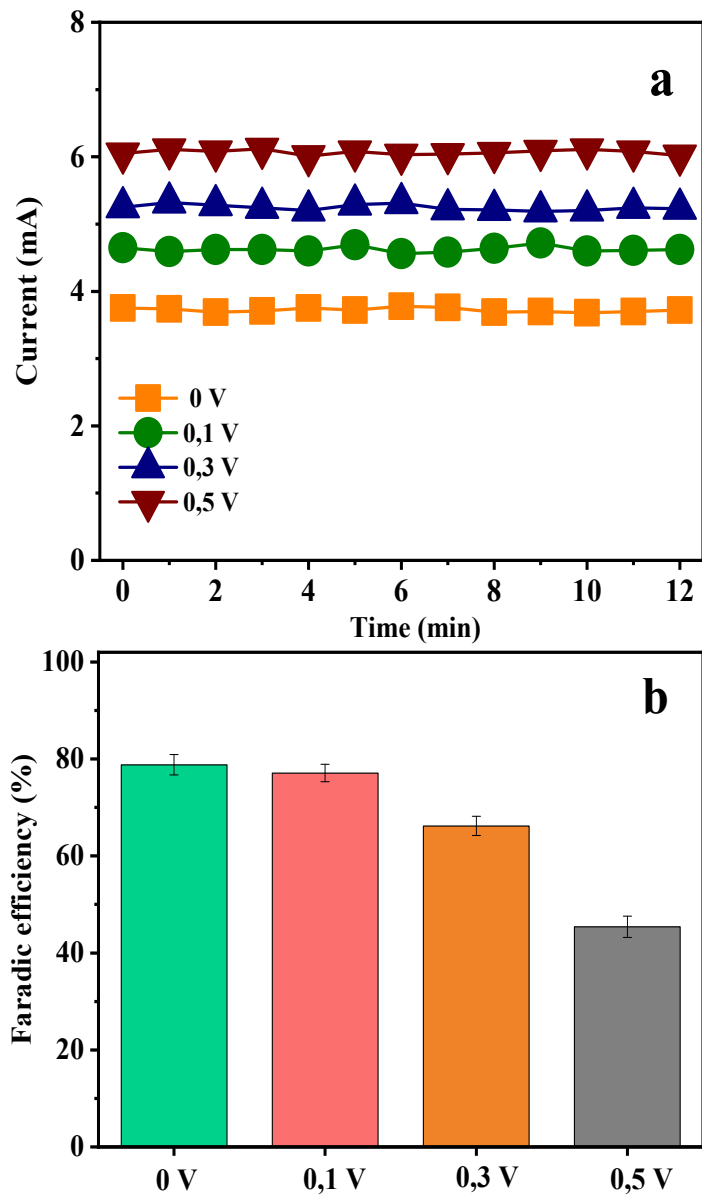

**Fig. S5.** The effect of applied voltage (current (a) and Faradic efficiency (b)) on  $H_2O_2$  production in the BSPS reactor.

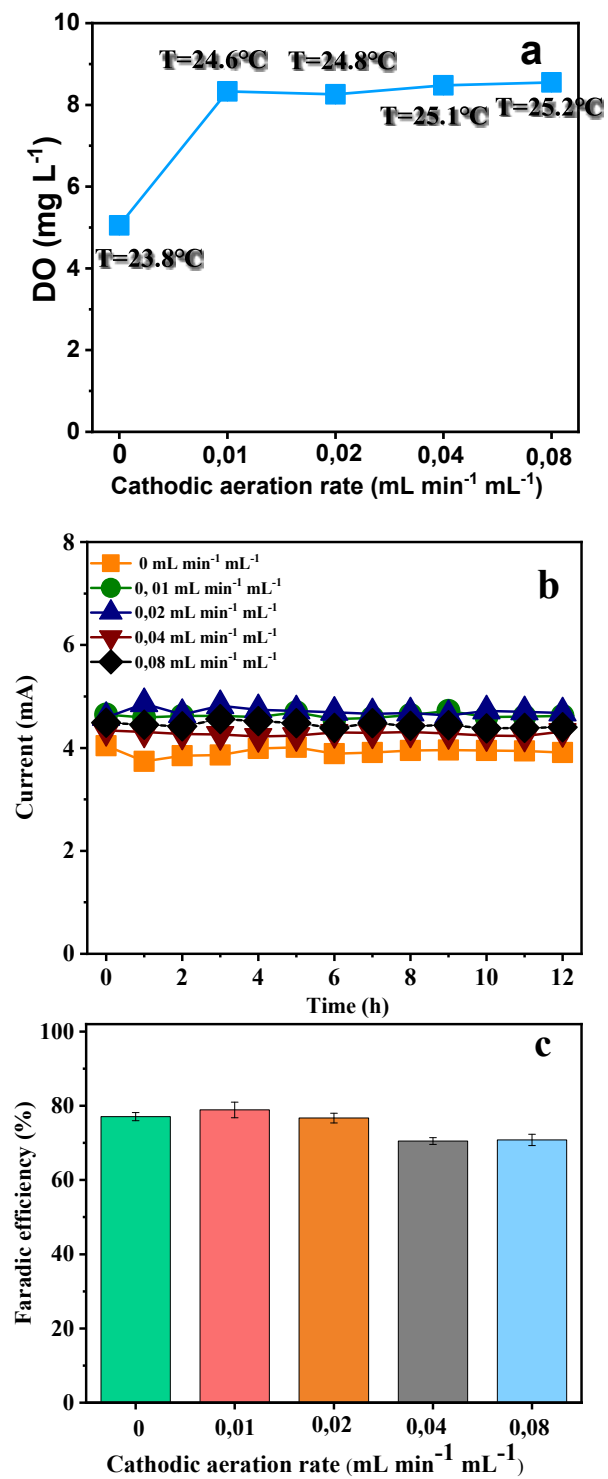

**Fig. S6.** The effect of cathodic aeration rate (catholyte DO (a), current (b), and Faradic efficiency (c)) on H<sub>2</sub>O<sub>2</sub> production in the BSPS reactor.

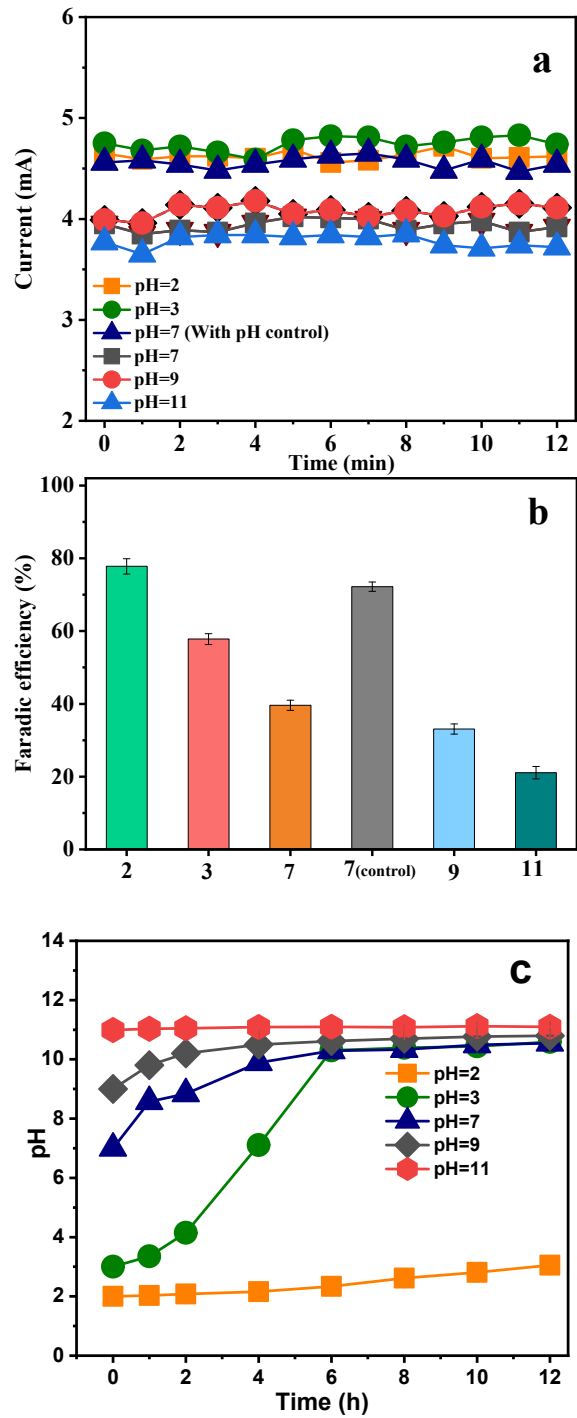

**Fig. S7.** The effect of initial catholyte pH (current (a), Faradic efficiency (b), and catholyte pH variation (c)) on  $\text{H}_2\text{O}_2$  production in the BSPS reactor.



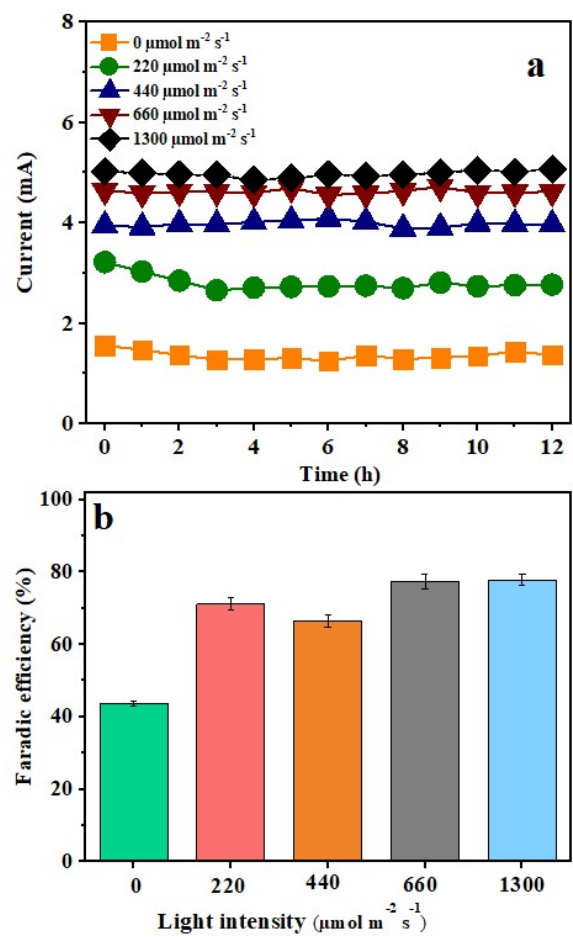

**Fig. S8.** The effect of light intensity (current (a) and Faradic efficiency (b)) on  $\text{H}_2\text{O}_2$  production in the BSPS reactor.

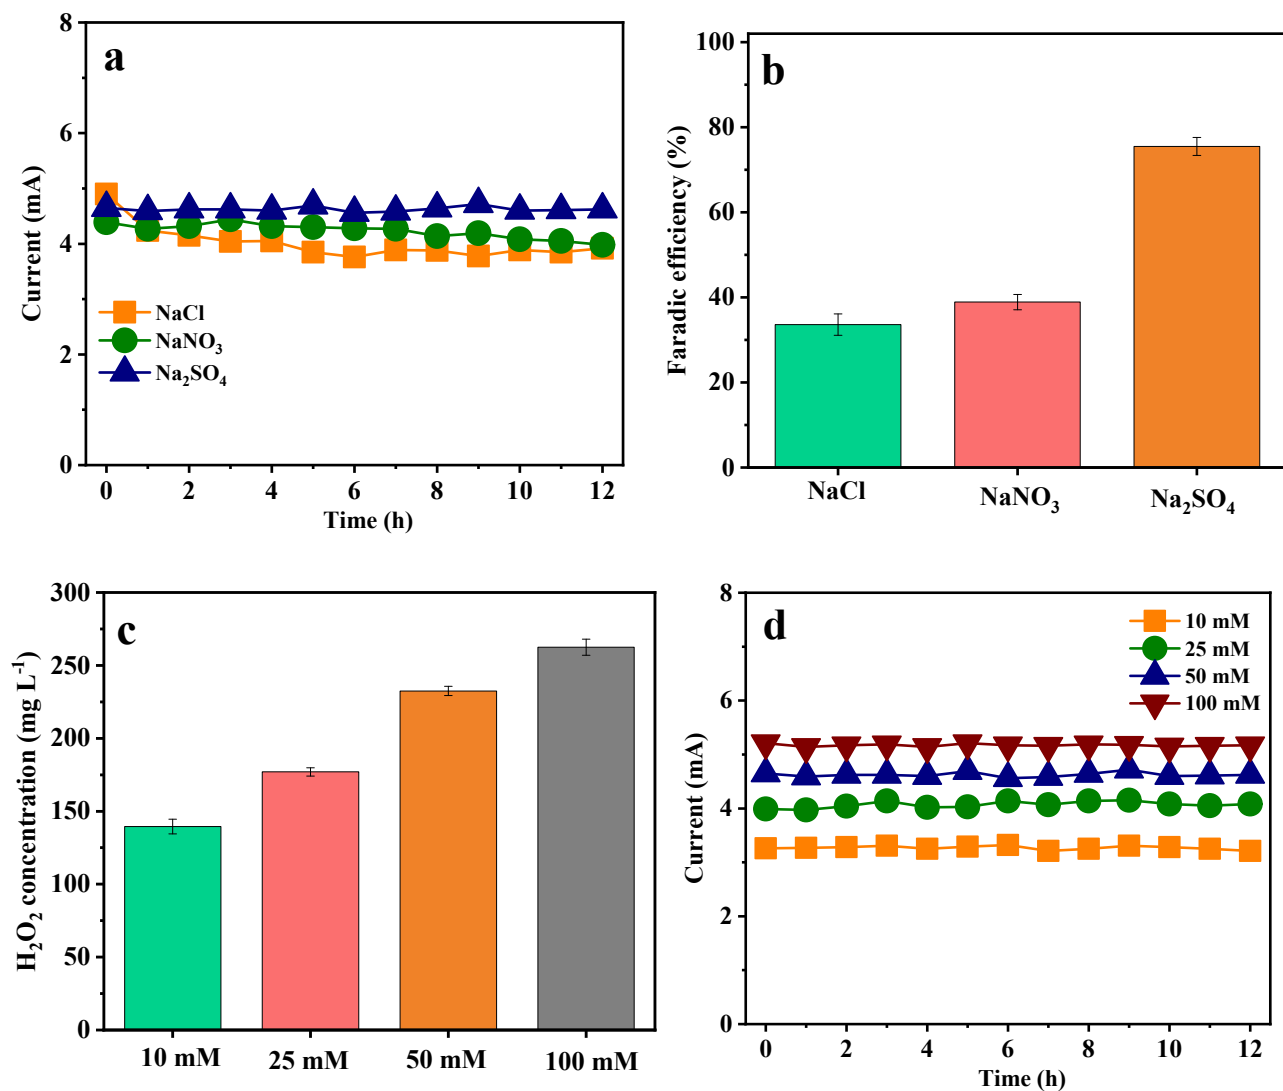

**Fig. S9.** The effect of electrolyte nature (current (a) and Faradic efficiency (b)) and concentration (accumulated H<sub>2</sub>O<sub>2</sub> concentration (c) and current (d)) on H<sub>2</sub>O<sub>2</sub> production in the BSPS reactor.

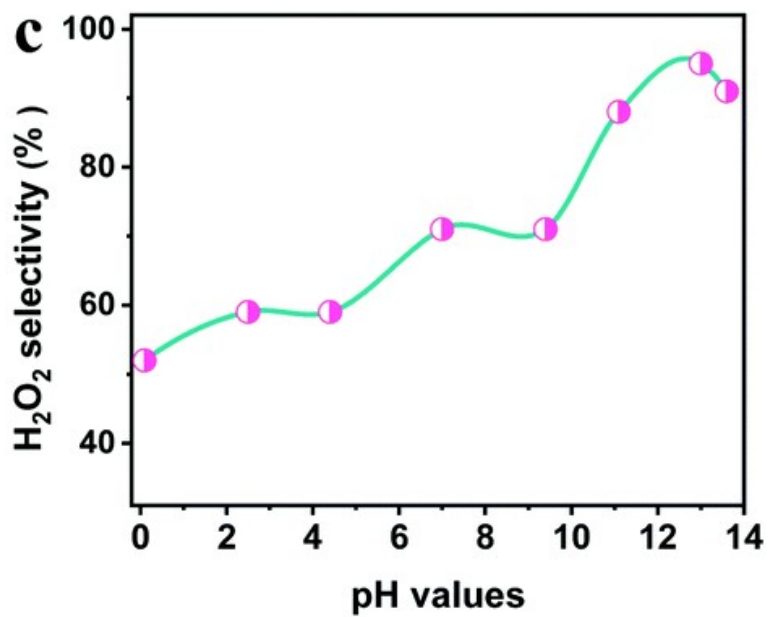

**Fig. S10.** pH dependent H<sub>2</sub>O<sub>2</sub> selectivity of pTTh calculated by RRDE results <sup>11</sup>.

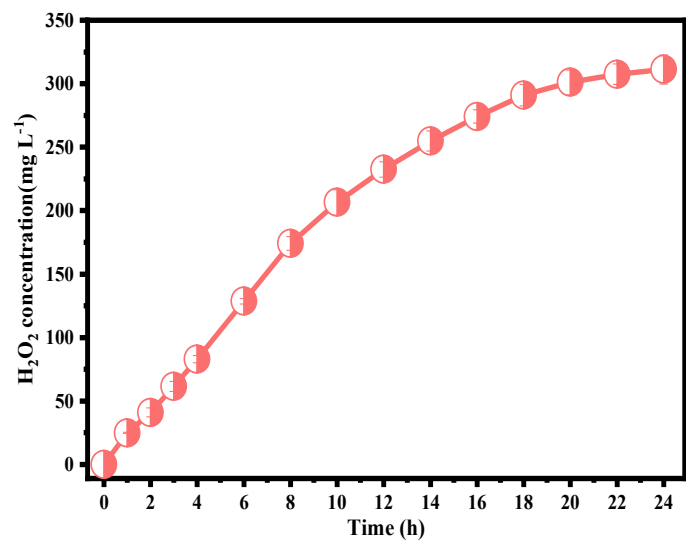

**Fig. S11.** Concentration of  $\text{H}_2\text{O}_2$  produced cumulatively with reaction time in BSPS reactor.

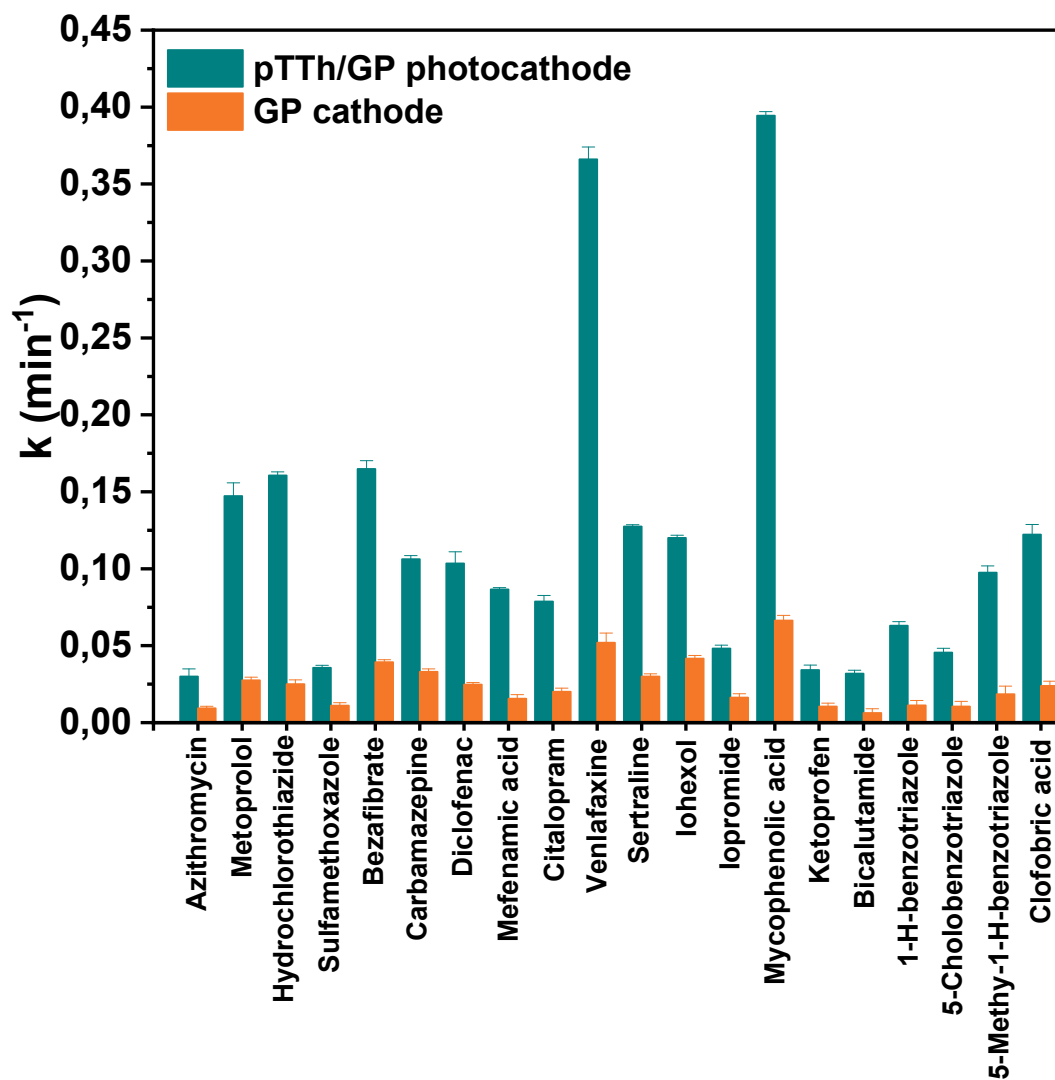

**Fig. S12.** Pseudo-first-order rate constants ( $k$ ) of the degradation of 20 typical micropollutants from WWTP secondary effluent during BSEF treatment using pTTh/GP photocathode electrode and GP cathode, respectively.

## References

1. Fu, L., You, S.J., Yang, F.l., Gao, M.m., Fang, X.h. and Zhang, G.q. Synthesis of hydrogen peroxide in microbial fuel cell. *J. Chem. Technol. Biot.* **2010**, 85(5), 715-719.
2. Li, N., Wang, S., An, J. and Feng, Y. Acid pretreatment of three-dimensional graphite cathodes enhances the hydrogen peroxide synthesis in bioelectrochemical systems. *Sci. Total. Environ.* **2018**, 630, 308-313.
3. Chen, J.-y., Li, N. and Zhao, L. Three-dimensional electrode microbial fuel cell for hydrogen peroxide synthesis coupled to wastewater treatment. *J. Power Sources* **2014**, 254, 316-322.
4. Chen, J.-y., Zhao, L., Li, N. and Liu, H. A microbial fuel cell with the three-dimensional electrode applied an external voltage for synthesis of hydrogen peroxide from organic matter. *J. Power Sources* **2015**, 287, 291-296.
5. Li, N., An, J., Zhou, L., Li, T., Li, J., Feng, C. and Wang, X. A novel carbon black graphite hybrid air-cathode for efficient hydrogen peroxide production in bioelectrochemical systems. *J. Power Sources* **2016**, 306, 495-502.
6. Young, M.N., Links, M.J., Popat, S.C., Rittmann, B.E. and Torres, C.I. Tailoring microbial electrochemical cells for production of hydrogen peroxide at high concentrations and efficiencies. *ChemSusChem* **2016**, 9(23), 3345-3352.
7. Modin, O. and Fukushi, K. Development and testing of bioelectrochemical reactors converting wastewater organics into hydrogen peroxide. *Water Sci Technol.* **2012**, 66(4), 831-836.
8. Sim, J., Reid, R., Hussain, A., An, J. and Lee, H.-S. Hydrogen peroxide production in a pilot-scale microbial electrolysis cell. *Biotechnol. Rep.* **2018**, 19, e00276.
9. Zou, R., Hasanzadeh, A., Khataee, A., Yang, X., Xu, M., Angelidaki, I. and Zhang, Y. Scaling-up of microbial electrosynthesis with multiple electrodes for in situ production of hydrogen peroxide. *IScience* **2021**, 24(2), 102094.
10. Zou, R., Rezaei, B., Keller, S.S. and Zhang, Y. Additive manufacturing-derived free-standing 3D pyrolytic carbon electrodes for sustainable microbial electrochemical production of H<sub>2</sub>O<sub>2</sub>. *J. Hazard. Mater.* **2024**,, 133681.
11. Fan, W., Zhang, B., Wang, X., Ma, W., Li, D., Wang, Z., Dupuis, M., Shi, J., Liao, S. and Li, C. Efficient hydrogen peroxide synthesis by metal-free polyterthiophene via photoelectrocatalytic dioxygen reduction. *Energy Environ. Sci.* **2020**, 13(1), 238-245.
